# Supplementary material for: Experimental and theoretical evaluation of crystal facet exposure on the charge transfer and SERS activity of ZnO films
Source: Royal Society of Chemistry journal article supplement (doi:10.1039/d2nr04476e), 2022-01-01
Supplement: d2nr04476e1.pdf [file d2nr04476e1.pdf]

## Supplemental Files

### Experimental and theoretical evaluation of crystal facets exposure on the charge transfer and SERS activity of ZnO films

Yuwei Luo <sup>a</sup>, Lengyuan Niu<sup>\*a</sup>, Yifan Wang <sup>a</sup>, Peipei Wen <sup>a</sup>,

Yinyan Gong <sup>a</sup>, Can Li <sup>\*a</sup>, Shiqing Xu <sup>a</sup>

<sup>a</sup> *College of Optical and Electronic Technology, China Jiliang University, Hangzhou 310020,  
Zhejiang, China*

---

\* Corresponding authors, E-mail: [niulengyuan@163.com](mailto:niulengyuan@163.com); [canli1983@gmail.com](mailto:canli1983@gmail.com).  
Fax: +86-571-86872363, Tel.: +86-571-86872363.

## 1. The relationship between SERS intensity of 4-NBT and deposition time of ZnO substrate

A series of ZnO with different deposition time (from 5 to 50 min) were prepared, and the SERS spectra of 4-NBT were collected from the as-prepared ZnO films. As shown in **Fig. S1**, the SERS intensity of 4-NBT molecules on ZnO substrates reaches the maximum when the deposition times are about 20–30 min. Therefore, the optimal deposition time of both three samples were selected as 30 min.

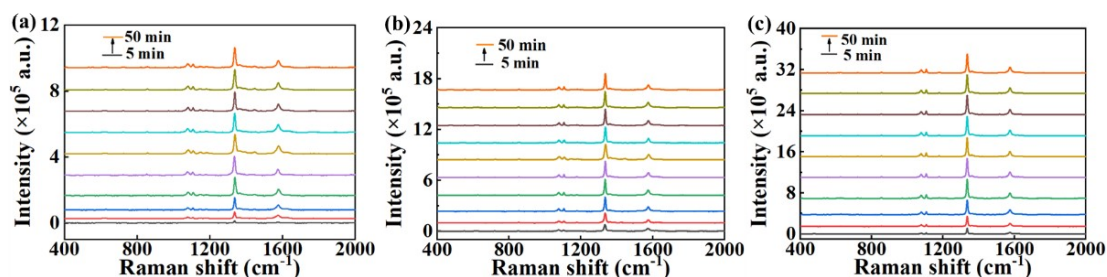

**Fig. S1** SERS spectra of 4-NBT collected from (a) ZnO{10 $\bar{1}$ 0}, (b) ZnO{0001} and (c) ZnO{10 $\bar{1}$ 1} films with different electrodeposition time (from 5 to 50 min).

## 2. Ultraviolet–visible absorption spectra of ZnO/4-NBT system and SERS spectra of ZnO/R6G system

As shown in **Fig. S2a**, a visible CT-induced absorption band around 550 nm was detected from 4-NBT on ZnO{10 $\bar{1}$ 1} by comparing with the pristine ZnO{10 $\bar{1}$ 1} and pure 4-NBT molecules, which suggest that a CT process might happen between ZnO and 4-NBT molecule. **Fig. S2b** displays the Raman spectra of R6G solution and the SERS spectra of R6G molecule adsorbed on ZnO{10 $\bar{1}$ 0}, ZnO{0001} and ZnO{10 $\bar{1}$ 1}, respectively. As shown in **Fig. S2b**, the a'' vibration mode at 611 cm $^{-1}$  of R6G molecule was selectively enhanced than other vibration mode. According to Herzberg–Teller selection rule, if the enhanced Raman scattering was caused by CT process, the vibration modes of probe molecule would be selectively enhanced (the vibration

modes with not totally symmetric ( $a''$ ) would be more heightened than totally symmetric modes ( $a'$ ) for probe molecule adsorbed on semiconductors). Therefore, these results both confirm the existence of CT process between the ZnO SERS substrate and probe molecule.

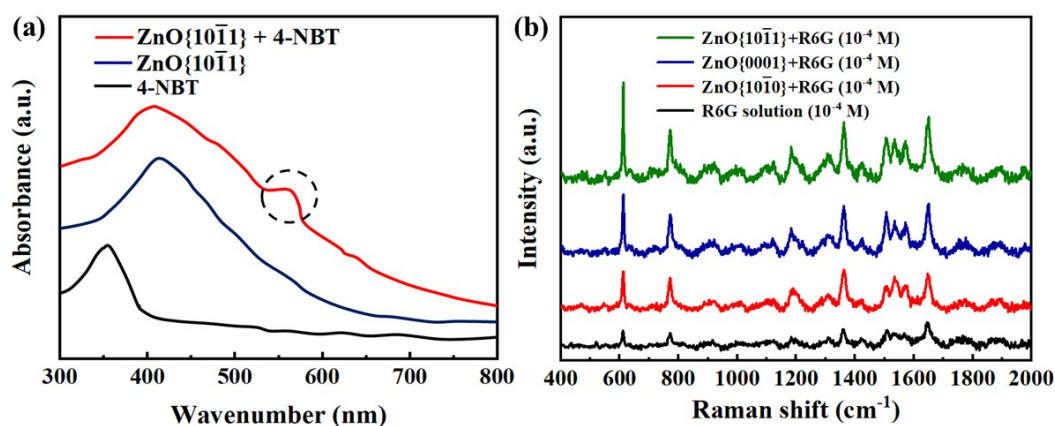

**Fig. S2** (a) Ultraviolet–visible absorption spectra of 4–NBT adsorbed on ZnO{10 $\bar{1}$ 1} in comparing with that of pure 4–NBT and ZnO{10 $\bar{1}$ 1}, (b) Comparing different vibration modes between Raman spectra of pure R6G solution and SERS spectra of R6G molecule adsorbed on ZnO{10 $\bar{1}$ 0}, ZnO{0001} and ZnO{10 $\bar{1}$ 1}, respectively.

### 3. The EF value of as–prepared ZnO substrates compared with other reference

The relevant reports about ZnO based SERS substrates are listed in **Table S1**. The EF for 4–NBT is calculated to be about  $9 \times 10^3$ ,  $1.6 \times 10^4$  and  $2.8 \times 10^4$  for ZnO{10 $\bar{1}$ 0}, ZnO{0001} and ZnO{10 $\bar{1}$ 1}, which shown a relatively higher EF value compared with those reported ZnO substrates (**Table S1**), and certified that {10 $\bar{1}$ 1} facets dominated ZnO exhibit the highest SERS enhancement.

**Table S1** The EF value of as–prepared ZnO substrates compared with other reference.

| Substrates | Molecules          | EF           | LOD (M) | References |
|------------|--------------------|--------------|---------|------------|
| ZnO        | D266 <sup>a</sup>  | More than 50 | –       | [1]        |
| ZnO        | 4–MPY <sup>b</sup> | $10^3$       | –       | [2]        |

|                           |                    |                        |                      |              |
|---------------------------|--------------------|------------------------|----------------------|--------------|
| ZnO                       | 4-MBA <sup>c</sup> | –                      | –                    | [3]          |
| ZnO                       | 4-MPY              | 10 <sup>3</sup>        | –                    | [4]          |
| ZnO                       | 4-MBA              | 10 <sup>3</sup>        | 10 <sup>-6</sup>     | [5]          |
| ZnO                       | 4-MPY              | 68                     | –                    | [6]          |
| Amorphous ZnO             | 4-MPY              | 6.62 × 10 <sup>5</sup> | –                    | [7]          |
| Porous d-ZnO <sup>d</sup> | 4-MPY              | 7.7 × 10 <sup>5</sup>  | 10 <sup>-7</sup>     | [8]          |
| Ga-doped ZnO              | 4-MBA              | 8.13 × 10 <sup>3</sup> | –                    | [9]          |
| Co-doped ZnO              | 4-MBA              | 10 <sup>3</sup>        | –                    | [10]         |
| ZnO films                 | 4-NBT              | 2.8 × 10 <sup>4</sup>  | 5 × 10 <sup>-7</sup> | Current work |

<sup>a</sup> D266: 1-methyl-1'-propylsulpho-2,2'-cyanine sulphonate.

<sup>b</sup> 4-MPY: 4-mercaptopyridine.

<sup>c</sup> 4-MBA: 4-mercaptobenzoic acid.

<sup>d</sup> Porous d-ZnO: defect states in porous ZnO.

## References

1. Wen, H., Surface enhancement of Raman and absorption spectra from cyanine dye D266 adsorbed on ZnO colloids. *Molecular Physics* **1996**, *88* (1), 281–290.
2. Wang, Y.; Ruan, W.; Zhang, J.; Yang, B.; Xu, W.; Zhao, B.; Lombardi, J. R., Direct observation of surface-enhanced Raman scattering in ZnO nanocrystals. *Journal of Raman Spectroscopy: An International Journal for Original Work in all Aspects of Raman Spectroscopy, Including Higher Order Processes, and also Brillouin and Rayleigh Scattering* **2009**, *40* (8), 1072–1077.
3. Sun, Z.; Zhao, B.; Lombardi, J. R., ZnO nanoparticle size-dependent excitation of surface Raman signal from adsorbed molecules: Observation of a charge-transfer resonance. *Applied Physics Letters* **2007**, *91* (22), 221106.
4. Shin, H.-Y.; Shim, E.-L.; Choi, Y.-J.; Park, J.-H.; Yoon, S., Giant enhancement of the Raman

- response due to one-dimensional ZnO nanostructures. *Nanoscale* **2014**, *6* (24), 14622–14626.
5. Liu, Q.; Jiang, L.; Guo, L., Precursor-directed self-assembly of Porous ZnO nanosheets as high-performance surface-enhanced raman scattering substrate. *Small* **2014**, *10* (1), 48–51.
  6. Jin, L.; She, G.; Wang, X.; Mu, L.; Shi, W., R. *Applied surface science* **2014**, *320*, 591–595.
  7. Wang, X.; Shi, W.; Jin, Z.; Huang, W.; Lin, J.; Ma, G.; Li, S.; Guo, L., Remarkable SERS activity observed from amorphous ZnO nanocages. *Angewandte Chemie* **2017**, *129* (33), 9983–9987.
  8. Lin, J.; Yu, J.; Akakuru, O. U.; Wang, X.; Yuan, B.; Chen, T.; Guo, L.; Wu, A., Low temperature-boosted high efficiency photo-induced charge transfer for remarkable SERS activity of ZnO nanosheets. *Chemical science* **2020**, *11* (35), 9414–9420.
  9. Li, P.; Wang, X.; Zhang, X.; Zhang, L.; Yang, X.; Zhao, B., Investigation of the charge-transfer between Ga-doped ZnO nanoparticles and molecules using surface-enhanced Raman scattering: Doping induced band-gap shrinkage. *Frontiers in chemistry* **2019**, *7*, 144.
  10. Xue, X.; Ruan, W.; Yang, L.; Ji, W.; Xie, Y.; Chen, L.; Song, W.; Zhao, B.; Lombardi, J. R., Surface-enhanced Raman scattering of molecules adsorbed on Co-doped ZnO nanoparticles. *Journal of Raman spectroscopy* **2012**, *43* (1), 61–64.
